# Supplementary material
Source: publisher figshare collection journal article supplement (https://geolsoc.figshare.com/ndownloader/files/22658000)
Supplement: Supplementary file 1 [file 22658000]

**Spatial and temporal influence of Pacific subduction on South China: geochemical migration of Cretaceous mafic-intermediate rocks**

Chengshi Gan 1, 2, Yuejun Wang 1, 2 *, Tiffany L. Barry 3,

Yuzhi Zhang 1, 2, Xin Qian 1, 2

1 Guangdong Provincial Key Lab of Geodynamics and Geohazards, School of Earth Sciences and Engineering, Sun Yat-sen University, Guangzhou, 510275, China

2 Southern Laboratory of Ocean Science and Engineering, Zhuhai, 519082, China

3 School of Geography, Geology and the Environment, University of Leicester, University Road, Leicester, LE1 7RH, UK

* Corresponding author’s address:

School of Earth Sciences and Engineering, Sun Yat-sen University,

No. 135, Xingang Xi Road, Guangzhou, 510275, P.R. China

Tel: 86-20-84111209;

Email: [wangyuejun@mail.sysu.edu.cn](mailto:wangyuejun@mail.sysu.edu.cn)

**Contents of this file**

Figures S1 to S4; Tables S1 to S3.

**Introduction**

This supporting information provides supplementary evidences and detailed data to support the main article’s viewpoints.


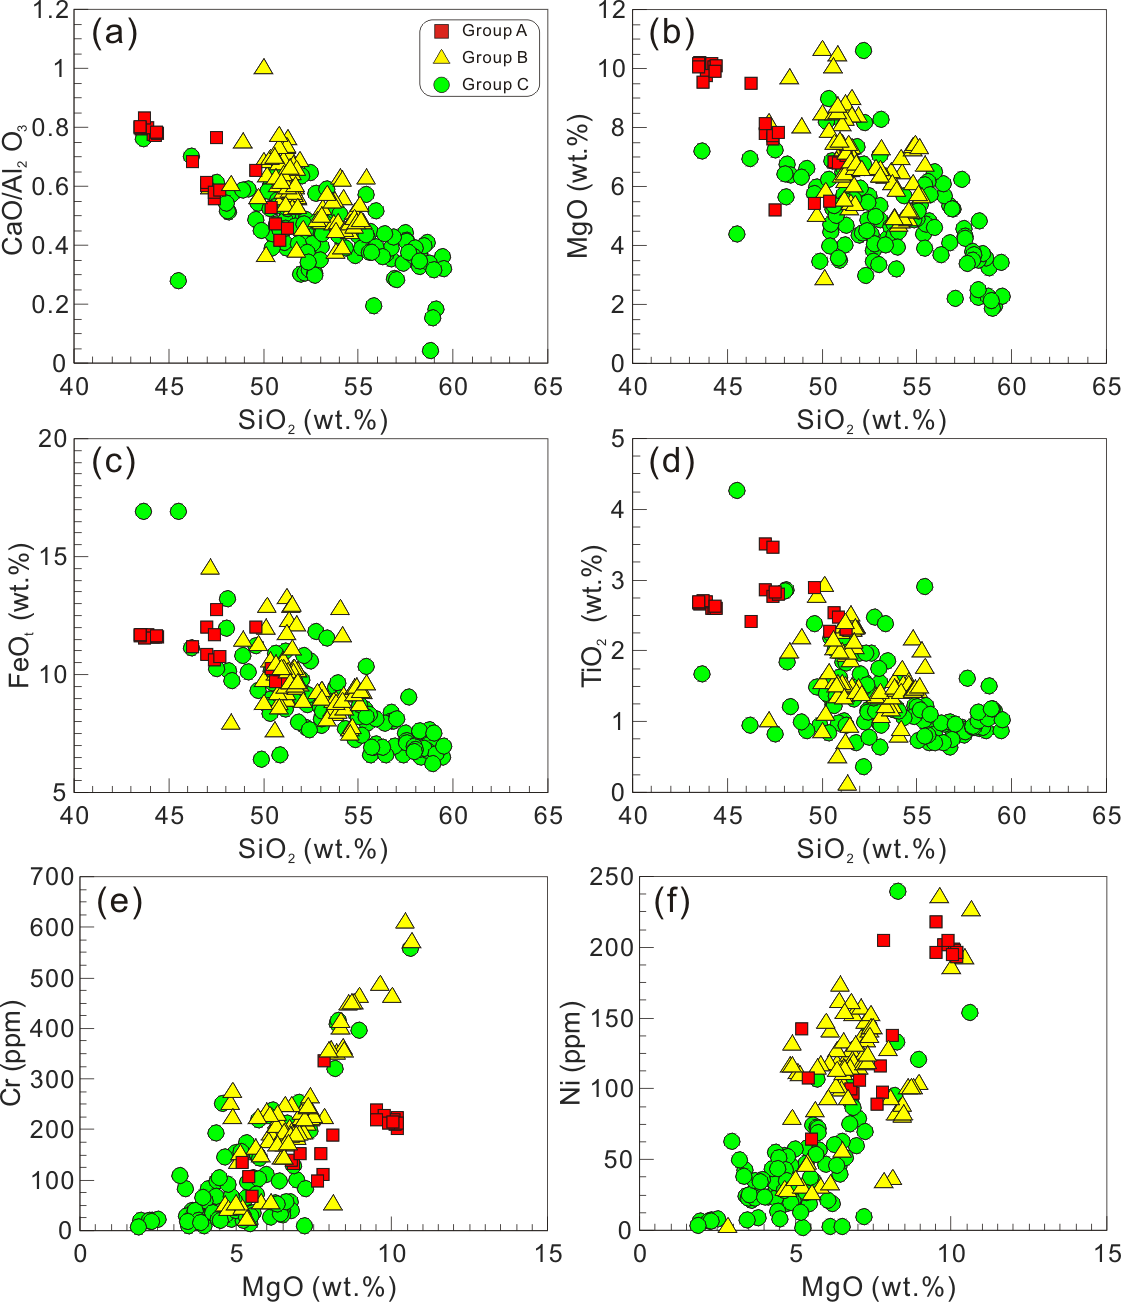


Fig. S1 SiO2-CaO/Al2O3 (a), MgO (b), FeOt (c) and TiO2 (d), and MgO-Cr (e) and Ni (f) diagrams for the Cretaceous mafic-intermediate igneous rocks in the southeastern SCB. Geochemical data of the Cretaceous mafic-intermediate igneous rocks are listed in Table S1.


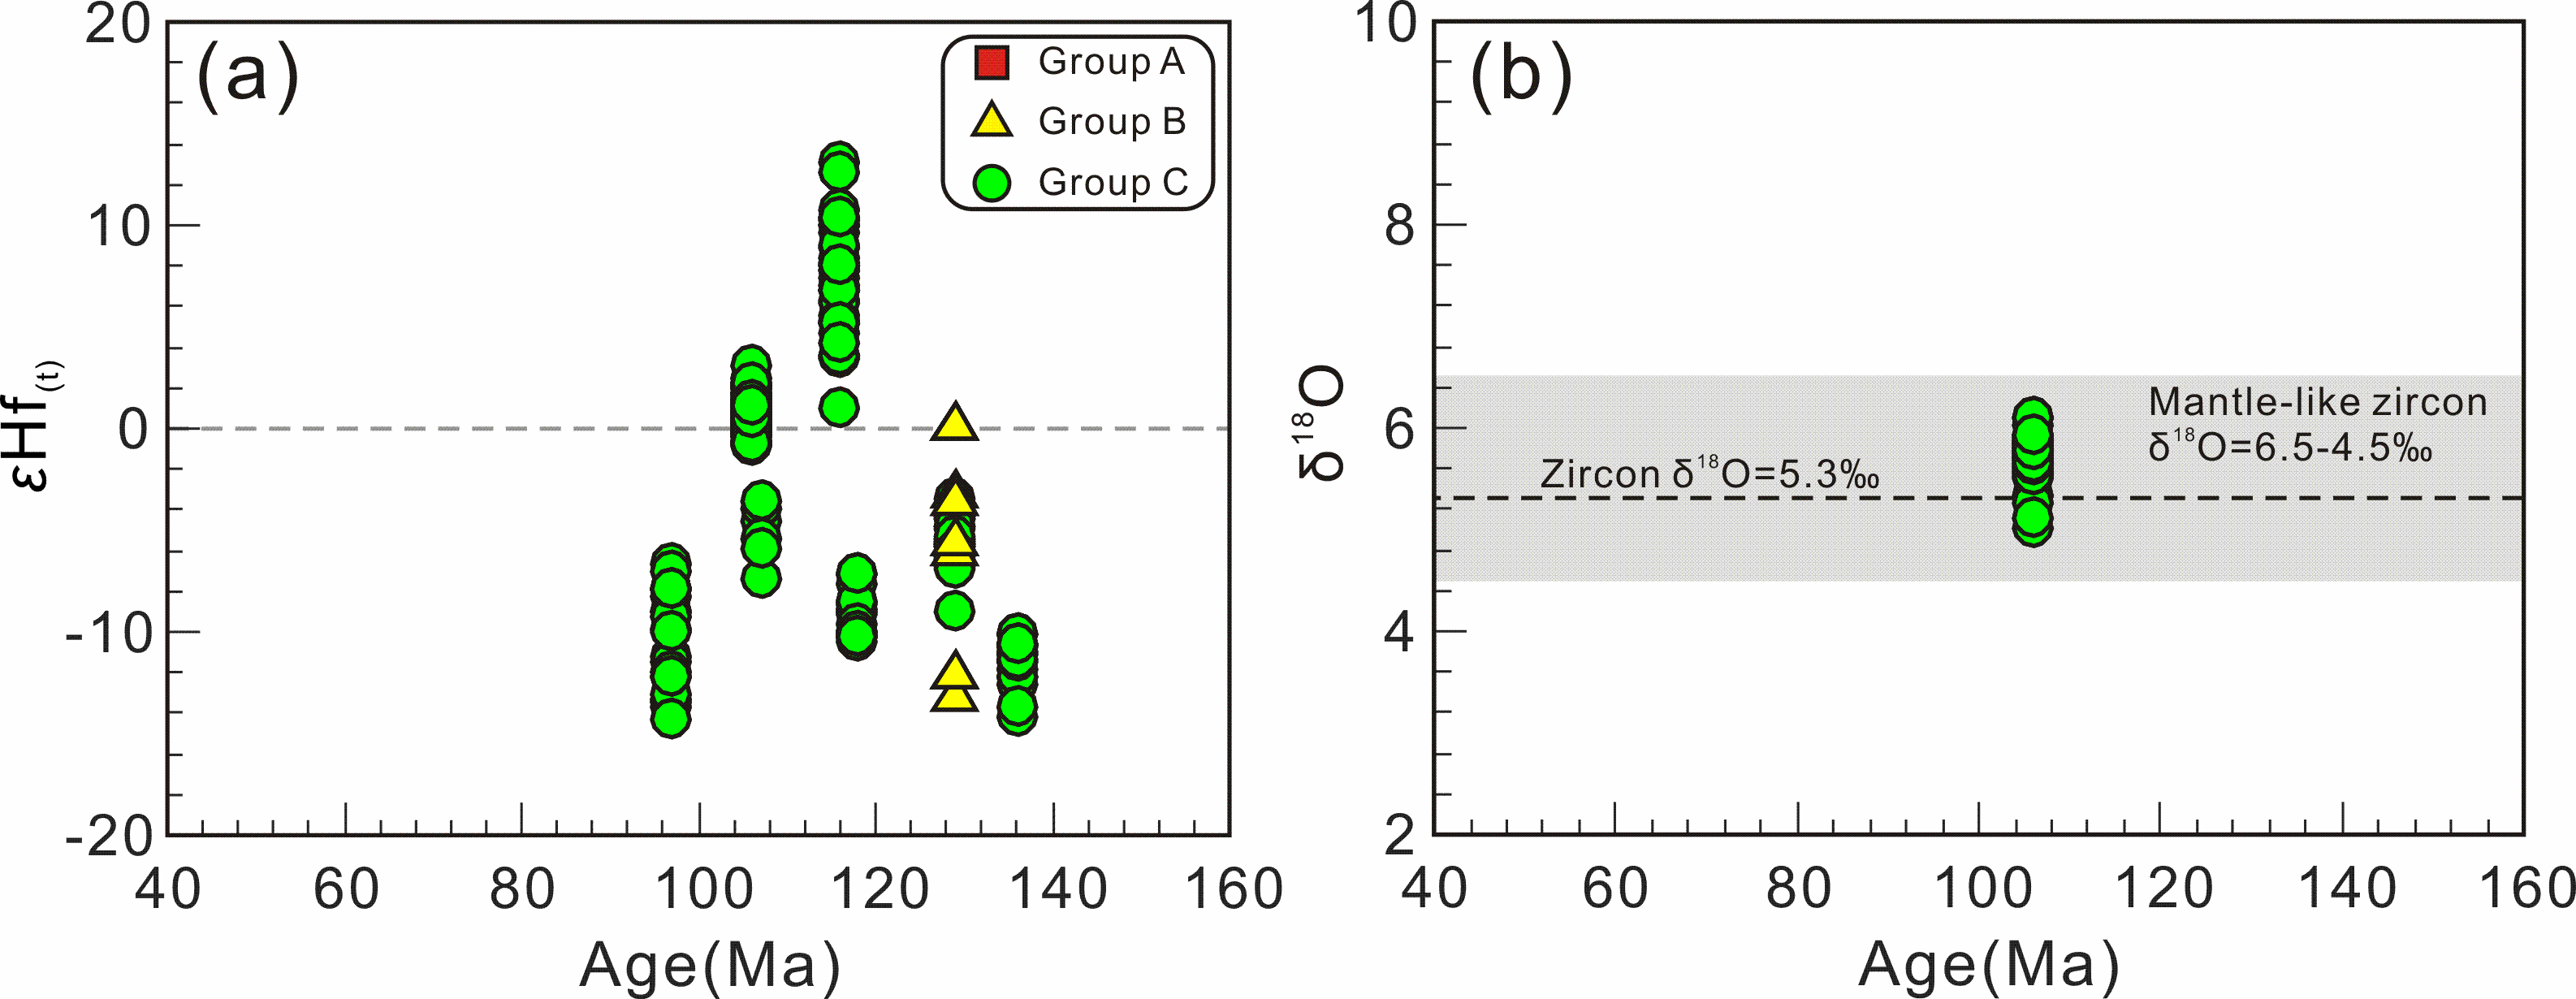


Fig. S2 Age-*ε*Hf(t) (a) and δ18O (b) for the Cretaceous mafic-intermediate igneous rocks in the southeastern SCB. The field of mantle-like zircon δ18O value (6.5-4.5 ‰) is from Valley *et al*. (1998). Geochemical data of the Cretaceous mafic-intermediate igneous rocks are listed in Table S3.


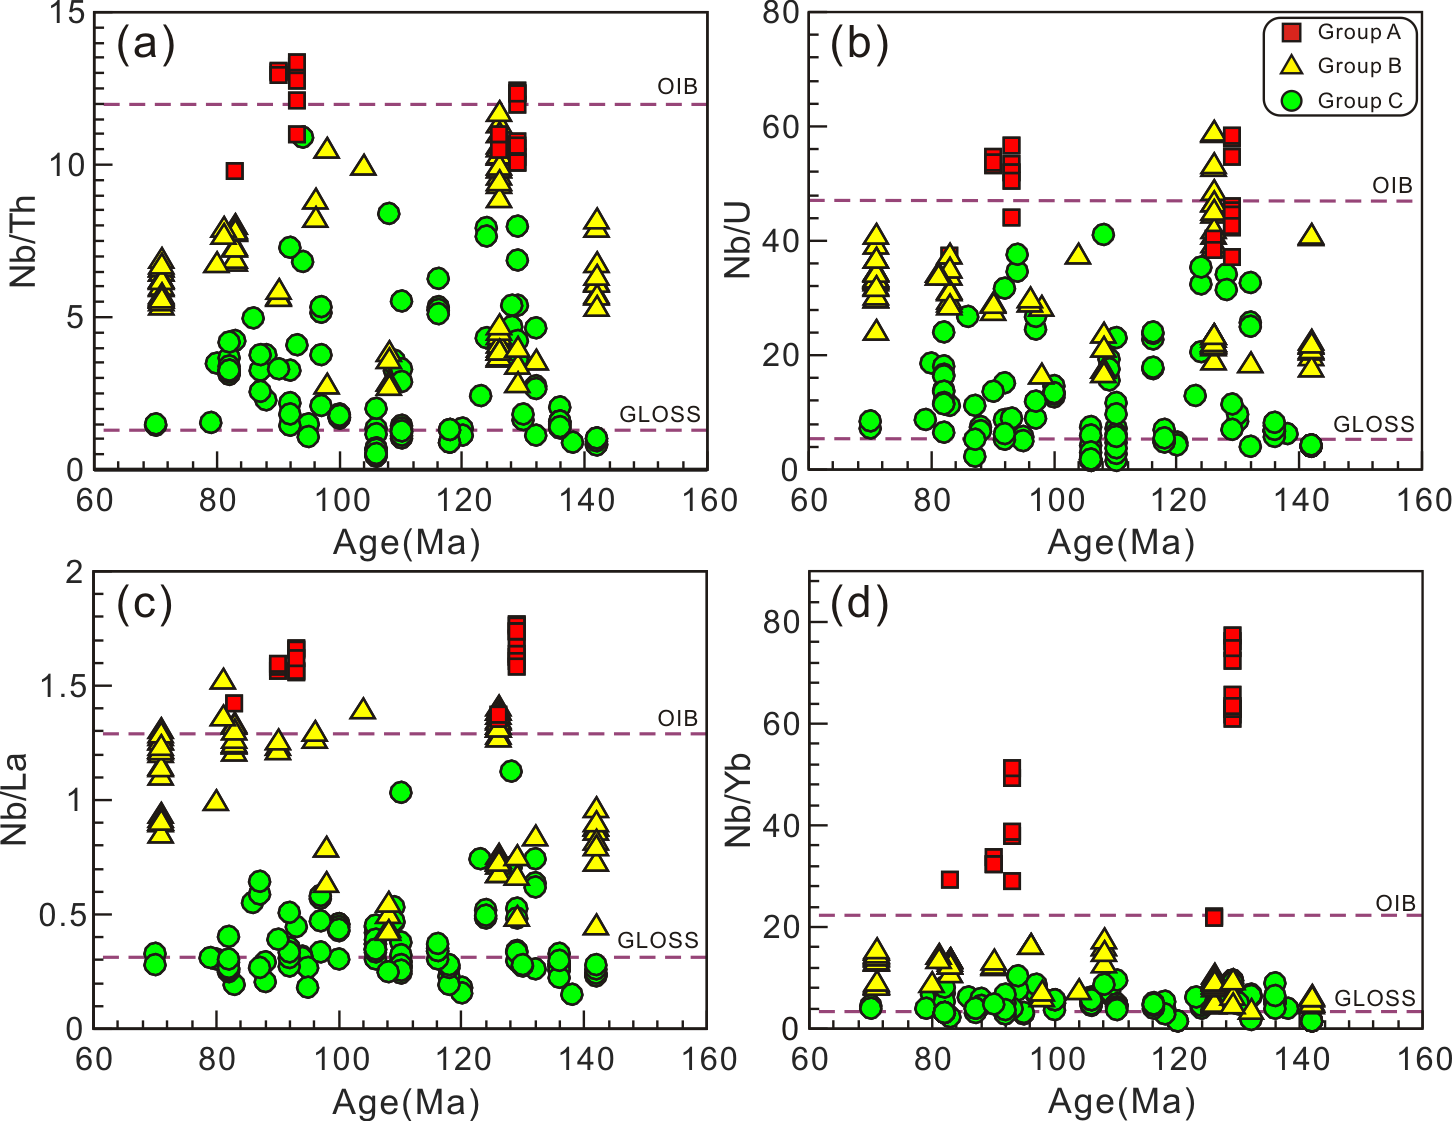
Fig. S3 Variations of trace element ratios for the Cretaceous mafic-intermediate igneous rocks in the southeastern SCB. Fields of GLOSS and OIB are from Plank & Langmuir (1998) and Sun & McDonough (1989), respectively. Geochemical data of the Cretaceous mafic-intermediate igneous rocks are listed in Table S1.


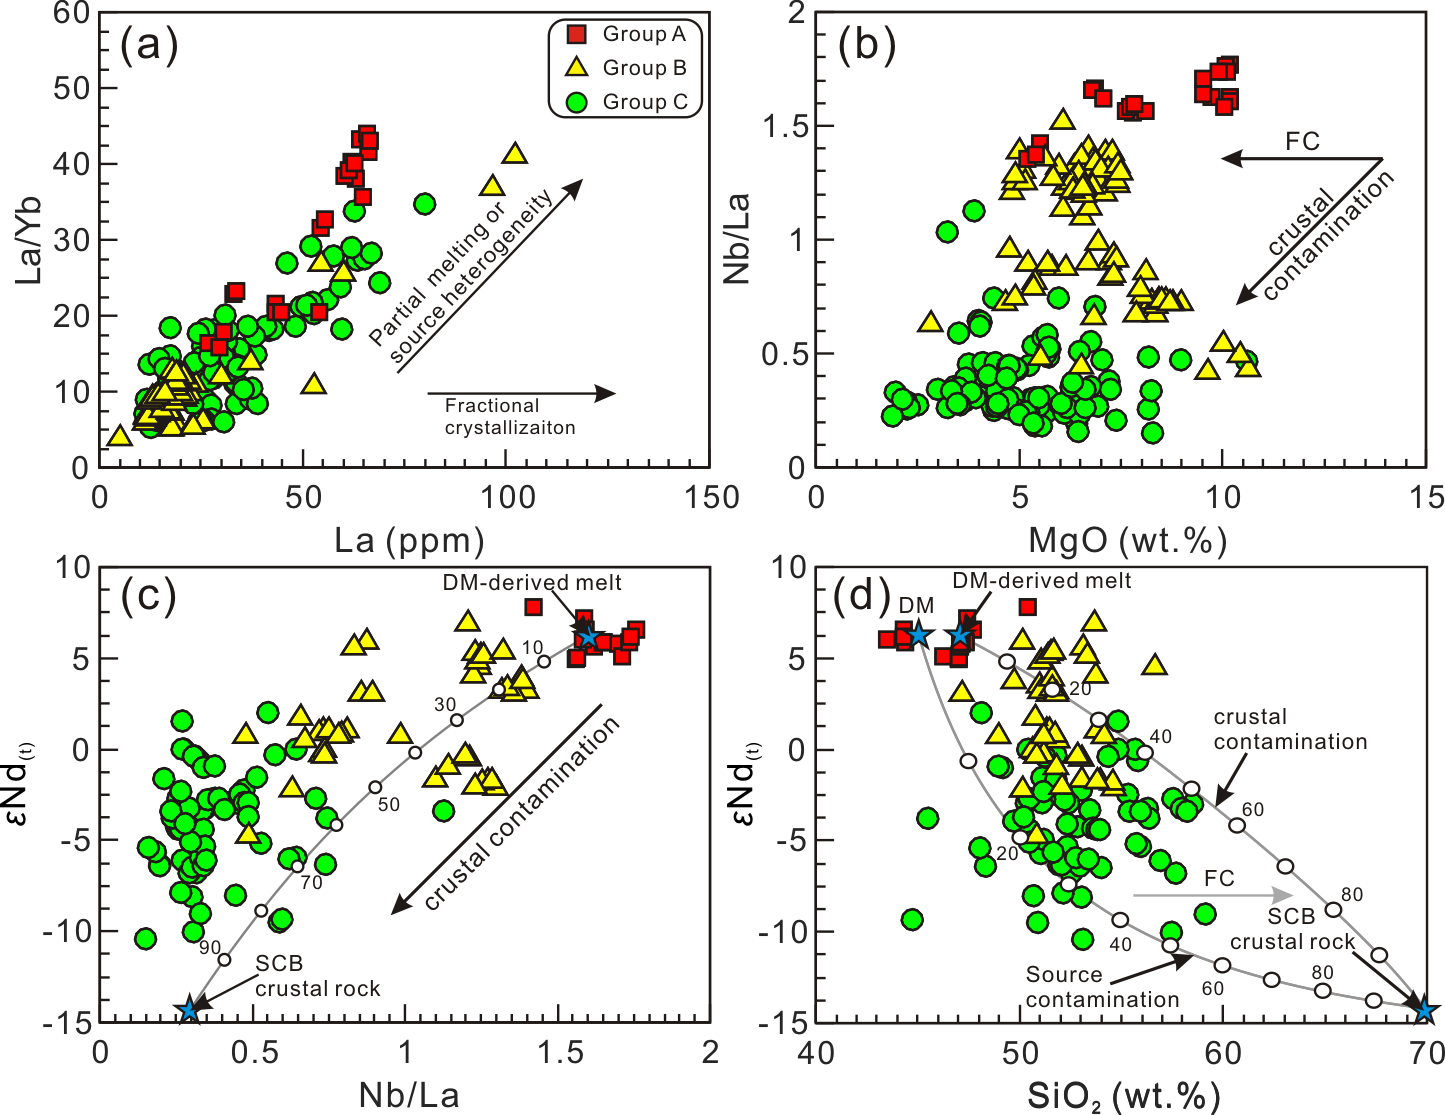


Fig. S4 (a) La-La/Yb, (b) MgO-Nb/La, (c) Nb/La-*ε*Nd(t) and (d) SiO2-*ε*Nd(t) for the Cretaceous mafic-intermediate igneous rocks in the southeastern SCB. DM is represented by Nd = 6.6 ppm, SiO2 =45.0% and *ε*Nd(t) = +6.3, and its derived melt by Nd = 45.3 ppm, Nb = 85.0 ppm, La = 53.0 ppm, SiO2 =47.0% and *ε*Nd(t) = +6.3 (Wang *et al*. 2003, 2008; Meng *et al*. 2012; Qi *et al*. 2016); SCB crustal rock by Nd = 31.1 ppm, Nb = 18.0 ppm, La = 61.0 ppm, SiO2 =70.0 wt% and *ε*Nd(t) = -14.3 (Zhao *et al*. 2012; Wang *et al*. 2013). Geochemical data of the Cretaceous mafic-intermediate igneous rocks are listed in Table S1 and S2.

# Supplemental table captions

Table S1 Major oxide (wt%) and trace element (ppm) compositions for the Cretaceous mafic-intermediate igneous rocks in the southeastern SCB

Table S2 Sr-Nd isotope compositions for the Cretaceous mafic-intermediate igneous rocks in the southeastern SCB

Table S3 Zircon Hf-O isotope compositions for the Cretaceous mafic-intermediate igneous rocks in the southeastern SCB

**References:**

Meng, L.F., Li, Z.X., Chen, H.L., Li, X.H. & Wang, X.C. 2012. Geochronological and geochemical results from Mesozoic basalts in southern South China Block support the flat-slab subduction model. *Lithos*, **132**, 127-140, <http://doi.org/DOI 10.1016/j.lithos.2011.11.022>.

Plank, T. & Langmuir, C.H. 1998. The chemical composition of subducting sediment and its consequences for the crust and mantle. *Chemical Geology*, **145**, 325-394.

Qi, Y.Q., Hu, R.Z., Liu, S., Coulson, I.M., Qi, H.W., Tian, J.J. & Zhu, J.J. 2016. Petrogenesis and geodynamic setting of Early Cretaceous mafic–ultramafic intrusions, South China: A case study from the Gan–Hang tectonic belt. *Lithos*, **258–259**, 149-162.

Sun, S.S. & McDonough, W.F. 1989. Chemical and isotopic systematics of oceanic basalts: implications for mantle composition and processes. *Geological Society, London, Special Publications*, **42**, 313-345, http://doi.org/10.1144/GSL.SP.1989.042.01.19.

Valley, J.W., Kinny, P.D., Schulze, D.J. & Spicuzza, M.J. 1998. Zircon megacrysts from kimberlite: oxygen isotope variability among mantle melts. *Contributions to Mineralogy and Petrology*, **133**, 1-11, <http://doi.org/DOI 10.1007/s004100050432>.

Wang, Y.J., Fan, W.M., Cawood, P.A. & Li, S.Z. 2008. Sr-Nd-Pb isotopic constraints on multiple mantle domains for Mesozoic mafic rocks beneath the South China Block hinterland. *Lithos*, **106**, 297-308, http://doi.org/DOI 10.1016/j.lithos.2008.07.019.

Wang, Y.J., Fan, W.M., Guo, F., Peng, T.P. & Li, C.W. 2003. Geochemistry of Mesozoic mafic rocks adjacent to the Chenzhou-Linwu fault, South China: Implications for the lithospheric boundary between the Yangtze and Cathaysia blocks. *International Geology Review*, **45**, 263-286, http://doi.org/Doi 10.2747/0020-6814.45.3.263.

Wang, Y.J., Zhang, A.M., Fan, W.M., Zhang, Y.H. & Zhang, Y.Z. 2013b. Origin of paleosubduction-modified mantle for Silurian gabbro in the Cathaysia Block: Geochronological and geochemical evidence. *Lithos*, **160-161**, 37-54, http://doi.org/DOI 10.1016/j.lithos.2012.11.004.

Zhao, L., Guo, F., Fan, W.M., Li, C.W., Qin, X.F. & Li, H.X. 2012. Origin of the granulite enclaves in Indo-Sinian peraluminous granites, South China and its implication for crustal anatexis. *Lithos*, **150**, 209-226, <http://doi.org/10.1016/j.lithos.2012.02.015>.
